# Supplementary material for: Ionic flow through partially blocked nanopores
Source: Royal Society of Chemistry journal article supplement (doi:10.1039/d4cp02365j), 2024-01-01
Supplement: d4cp02365j1.pdf [file d4cp02365j1.pdf]

Supplementary Information for

**Ionic Flow Through Partially Blocked Nanopores**

Sipra Mohapatra,<sup>1</sup> Hema Teherpuria,<sup>1</sup> Santosh Mogurampelly,<sup>1</sup> Matthew Downton,<sup>2</sup> and Sridhar Kumar Kannam<sup>3,\*</sup>

<sup>1</sup>Polymer Electrolytes and Materials Group (PEMG), Department of Physics, Indian Institute of Technology Jodhpur, N.H. 62, Nagaur Road, Karwar, Jodhpur, Rajasthan 342030, India

<sup>2</sup>National Computational Infrastructure, The Australian National University, Australia

<sup>3</sup>Department of Mathematics, School of Science, Computing and Engineering Technologies, Swinburne University of Technology, Melbourne, Victoria 3122, Australia

In this supplementary information, we provide (i) the concentration profiles of ions, and (iii) the potential of mean force.

## S1: The concentration profiles of ions

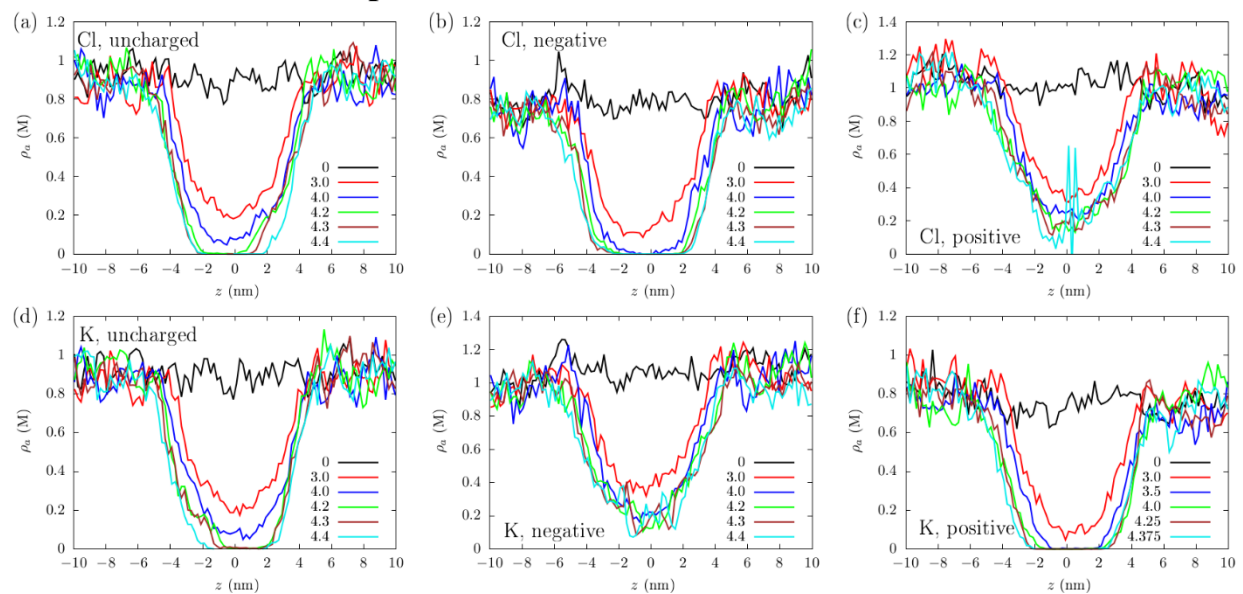

**Fig. S1:** The concentration profiles of ions in the axial direction of pore with radius 5 nm. The sampling bin width is 0.1 nm. The blockage radius is indicated on the plots.

## S2: The potential of mean force

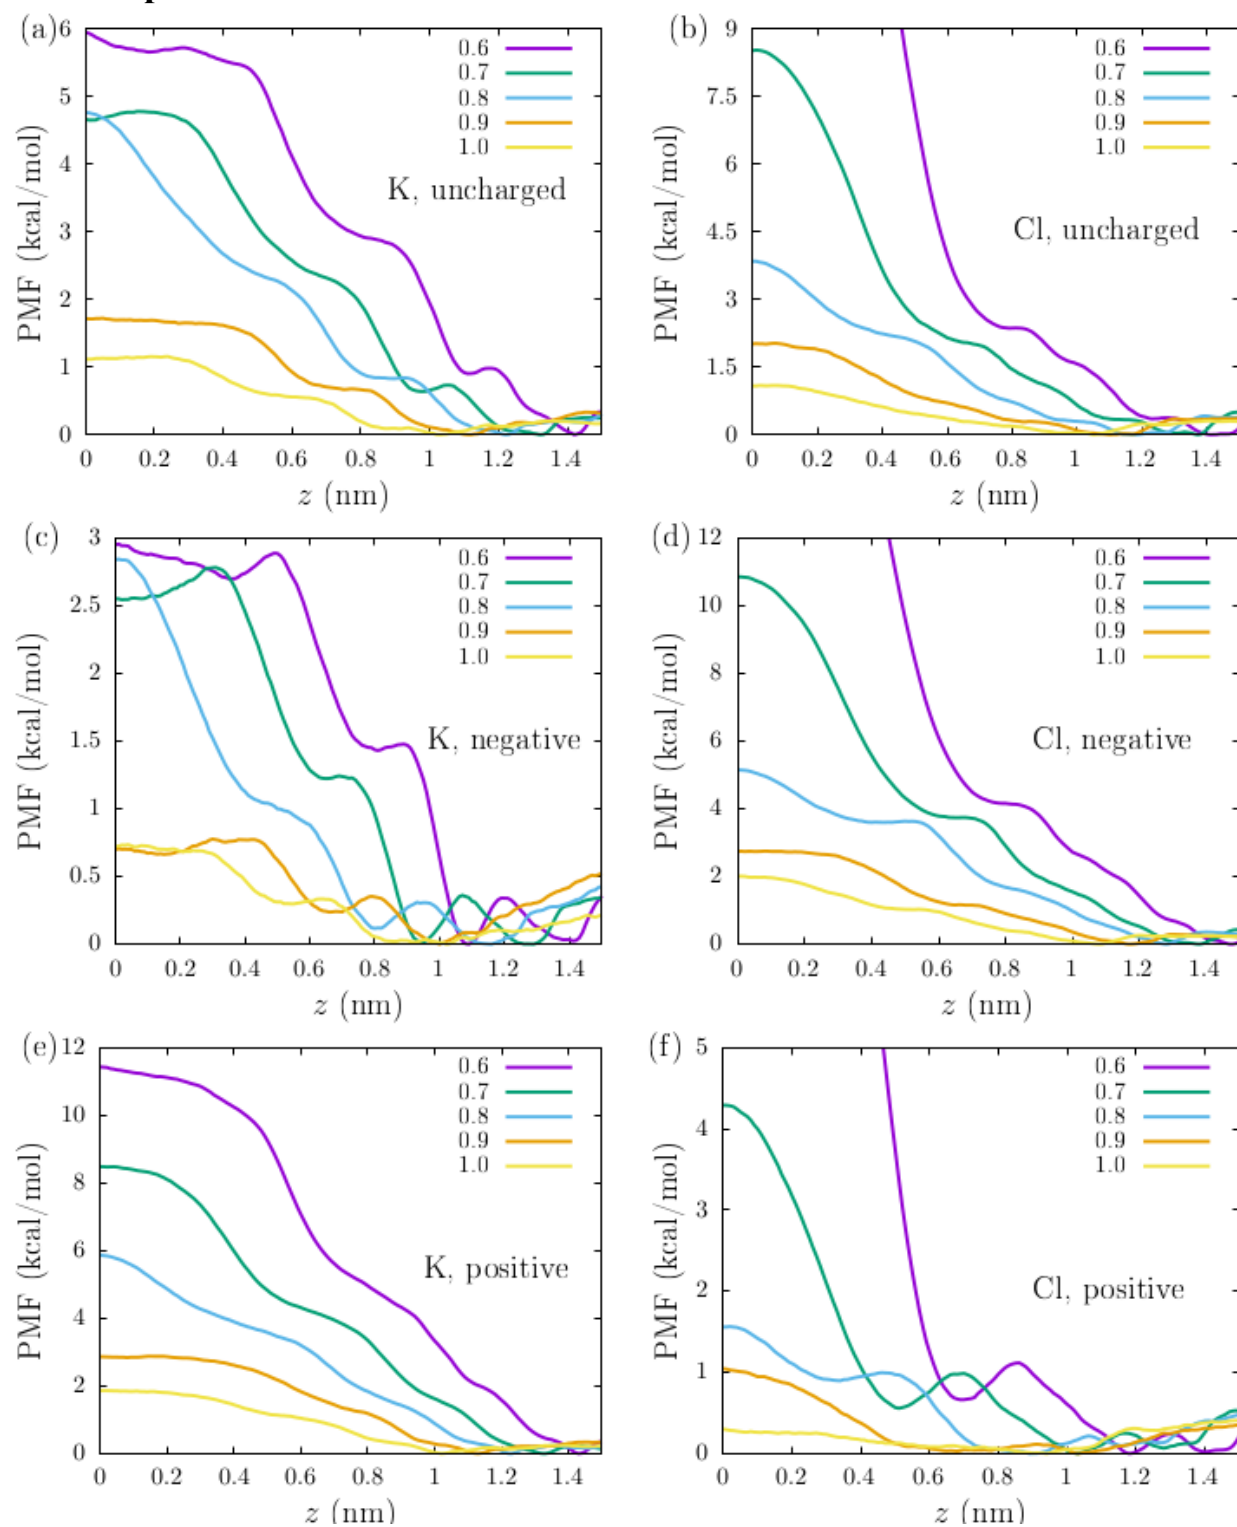

**Fig S2:** The potential of mean force of ions around the blockage inside pores with radius 1.49 nm. Pore gaps of 0.6 to 1.0 nm are created by placing the spherical blockages of radius 0.89 to 0.49 nm at the pore center.
